# Supplementary material for: Changes of phonon modes and electron transfer induced by interface interactions of Pd/MoS2 heterostructures
Source: Royal Society of Chemistry journal article supplement (doi:10.1039/d4nr01940g), 2024-01-01
Supplement: d4nr01940g1.pdf [file d4nr01940g1.pdf]

## Supporting Information

### Changes of phonon modes and electron transfer induced by interface interactions of Pd/MoS<sub>2</sub> heterostructures

Xinyi Chen<sup>1,#</sup>, Liang Zhou<sup>1,#</sup>, Yusong Wu<sup>1</sup>, Yadi Cao<sup>1</sup>, Wengui Jiang<sup>1</sup>, Yingying Xu<sup>1</sup>,

Rongming Wang<sup>1,\*</sup>, Yinghui Sun<sup>1,\*</sup>

<sup>1</sup>Beijing Key Laboratory for Magneto-Photoelectrical Composite and Interface  
Science, The State Key Laboratory for Advanced Metals and Materials, School of  
Mathematics and Physics, University of Science and Technology Beijing, Beijing  
100083, China

Address correspondence to R. M. Wang, E-mail: [rmwang@ustb.edu.cn](mailto:rmwang@ustb.edu.cn); Y. H. Sun, E-mail: [yhsun@ustb.edu.cn](mailto:yhsun@ustb.edu.cn)

## 1. Characterizations of the MoS<sub>2</sub> flake before and after transfer

The optical image of a mechanically-exfoliated MoS<sub>2</sub> flake on SiO<sub>2</sub>/Si substrate is shown in the inset of Figure S1a. Raman spectrum of the thinner layer of MoS<sub>2</sub> in Figure S1a displays the A<sub>1g</sub> and E<sub>2g</sub><sup>1</sup> modes, with an interval of 24.3 cm<sup>-1</sup>. Combined with the optical contrast of the MoS<sub>2</sub> flake on the SiO<sub>2</sub>/Si substrate, it can be determined as a four-layer (4L) MoS<sub>2</sub>. Subsequently, the MoS<sub>2</sub> flake was transferred onto a gold microgrid coated with a holey carbon film. As shown in Figure S1b, the surface of the MoS<sub>2</sub> flake after transfer appears quite clean.

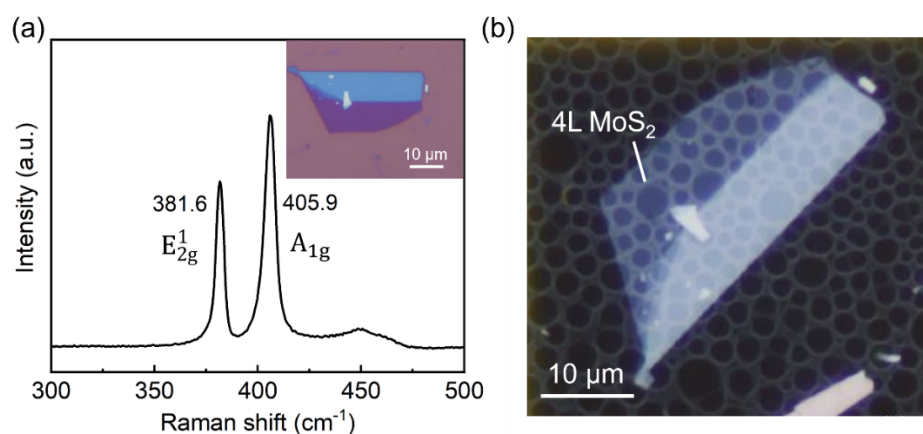

**Figure S1.** (a) Raman spectrum of the thinner layer of MoS<sub>2</sub>. Inset: Optical image of a MoS<sub>2</sub> flake on SiO<sub>2</sub>/Si substrate. Raman spectrum was captured from the thinner layer (purple color). (b) Optical image of the MoS<sub>2</sub> flake transferred on gold microgrid coated with a holey carbon film.

## 2. Schematic diagram and HRTEM image of Pd NPs/MoS<sub>2</sub> heterostructure on TEM microgrid

Figure S2a illustrates the schematic diagram of Pd NPs deposited on the MoS<sub>2</sub> flake on a gold TEM microgrid. HRTEM image in Figure S2b exhibits the typical striped moiré patterns. Figure S2c shows the fast Fourier transform (FFT) pattern of the

region marked by the red dashed frame in Figure S2b. Verified by the reciprocal vector difference formula, the moiré patterns emerge due to the superposition of the two crystal planes of  $(202)_{\text{Pd}}$  and  $(11\bar{2}0)_{\text{MoS}_2}$ . Furthermore, the expansion of the diffraction spots near the central spot reflects the rotational angle between the moiré fringes and the lattice plane of  $(11\bar{2}0)_{\text{MoS}_2}$ . The included angle between the two orange dashed lines is measured to be  $47.4^\circ$ , indicating that the rotation angles distribute within a range of  $\pm 23.7^\circ$ .

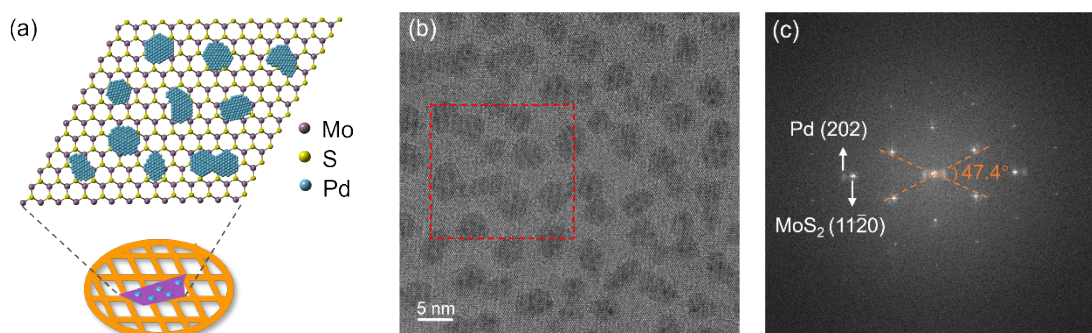

**Figure S2.** (a) The schematic of Pd NPs/MoS<sub>2</sub> heterostructure on a gold TEM microgrid. (b) HRTEM image of Pd NPs/MoS<sub>2</sub> heterostructure with moiré fringes. (c) Fast Fourier transform (FFT) pattern obtained from the region marked by the red dashed frame in (b). The expansion of the diffraction spots near the central spot reflects the distribution of the rotation angles. The included angle between the two orange dashed lines is measured to be  $47.4^\circ$ .

### 3. The proportion of element components in Pd/MoS<sub>2</sub> heterostructure

Table S1 shows the atomic number proportions of S, Pd, and Mo elements in Pd/MoS<sub>2</sub> heterostructure, respectively.

**Table S1** The proportion of element components in Pd/MoS<sub>2</sub> heterostructure.

| element | Line type | Kappa factor | Atomic percentage |
|---------|-----------|--------------|-------------------|
| S       | K         | 0.586        | 46.15             |
| Mo      | L         | 1.059        | 23.59             |
| Pd      | L         | 1.077        | 30.26             |
| Sum     |           |              | 100.00            |

#### 4. Raman intensity mapping of $A_{1g}$ and $A_{1g}'$ modes

The Raman intensity mapping was performed on a monolayer MoS<sub>2</sub> domain grown by CVD and deposited with Pd NPs. [Figure S3a](#) shows the optical image of the CVD-grown monolayer MoS<sub>2</sub> domain transferred on SiO<sub>2</sub>/Si substrate. The white dashed frame indicates the measurement region of Raman mapping. [Figures S3b](#) and [S3c](#) show the Raman intensity mapping of  $A_{1g}$  and  $A_{1g}'$  peaks at about 405 and 419 cm<sup>-1</sup>, respectively. The regions with stronger intensity (larger brightness) correspond to the MoS<sub>2</sub> area within the white dashed frame in [Figure S3a](#), while the dark regions corresponding to the surface of SiO<sub>2</sub>/Si substrate. The Raman intensity of  $A_{1g}'$  mode is distinctly lower than that of  $A_{1g}$  mode, therefore, the Raman intensity mapping of  $A_{1g}'$  peak is relatively dimmer ([Figure S3c](#)). However, it is noted that the  $A_{1g}'$  peak can

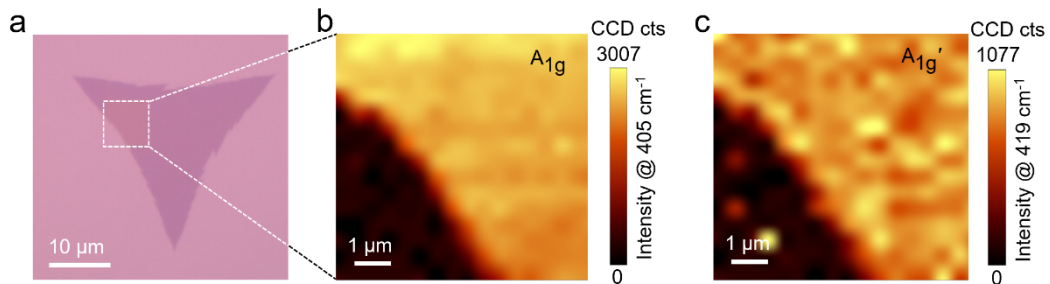

be detected on the whole Pd-MoS<sub>2</sub> area.

**Figure S3.** (a) Optical image of a CVD-grown monolayer MoS<sub>2</sub> domain transferred on SiO<sub>2</sub>/Si substrate. The white dashed frame indicates the measurement region of Raman mapping. (b, c) Raman mapping of the intensity of A<sub>1g</sub> and A<sub>1g</sub>' peaks, respectively.

## 5. Raman spectra of defect-rich MoS<sub>2</sub>

To exclude the possibility of the defects in MoS<sub>2</sub> inducing the new vibration mode, the defect-rich MoS<sub>2</sub> was obtained by air plasma treatment on few-layer MoS<sub>2</sub> flake for 25 s. The comparison of Raman spectra before and after the plasma treatment in [Figure S4](#) exhibits the broadened Raman peaks of E<sub>2g</sub><sup>1</sup> and A<sub>1g</sub> modes after the plasma treatment, rather than the emergence of any new phonon mode.

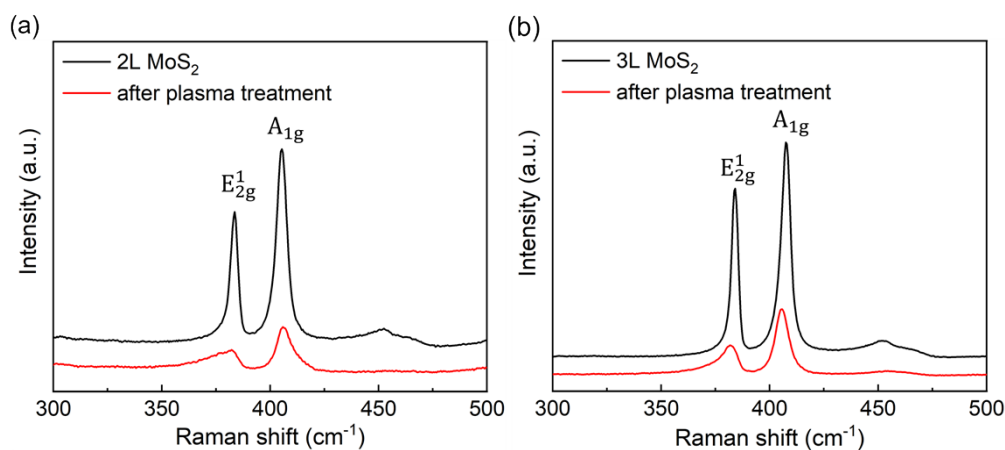

**Figure S4.** Raman spectra of 2L (a) and 3L (b) MoS<sub>2</sub> before and after air plasma treatment.

## 6. Optical images of exfoliated MoS<sub>2</sub> flakes and CVD-MoS<sub>2</sub> domains on SiO<sub>2</sub>/Si substrate

The optical images in [Figure S5a-b](#) clearly show that the distribution of CVD-MoS<sub>2</sub> domains is denser with higher coverage on the substrate, compared with the exfoliated MoS<sub>2</sub> flakes.

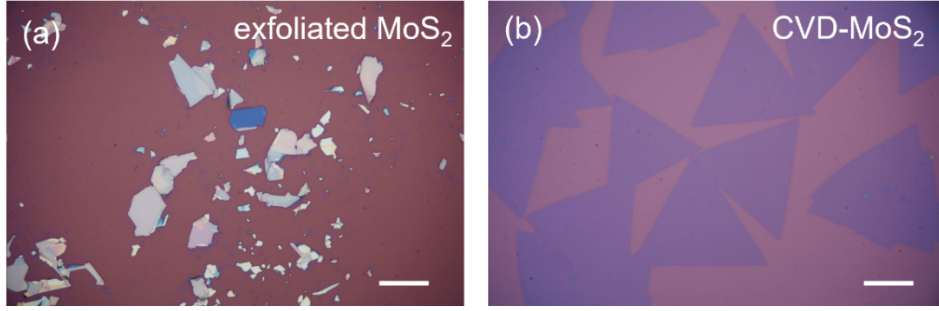

**Figure S5.** Optical images of mechanically exfoliated MoS<sub>2</sub> flakes (a) and monolayer MoS<sub>2</sub> domains grown by chemical vapor deposition (CVD) (b) on SiO<sub>2</sub>/Si substrate. The scale bars are all 20  $\mu$ m.

## 7. Differential charge density between monolayer MoS<sub>2</sub> and Pd atoms

The differential charge density between monolayer MoS<sub>2</sub> and Pd atoms was calculated by employing the Vienna ab initio simulation package (VASP) based on density functional theory (DFT). Theoretical calculations reveal the charge transfer between Pd atoms and MoS<sub>2</sub>. Pd diatom transfer 0.28 electrons to MoS<sub>2</sub>, with an average of 0.14 electrons transferred from per Pd atom (Figure S6a). Pd triatom transfer 0.33 electrons to MoS<sub>2</sub>, with an average of 0.11 electrons transferred from per Pd atom (Figure S6b).

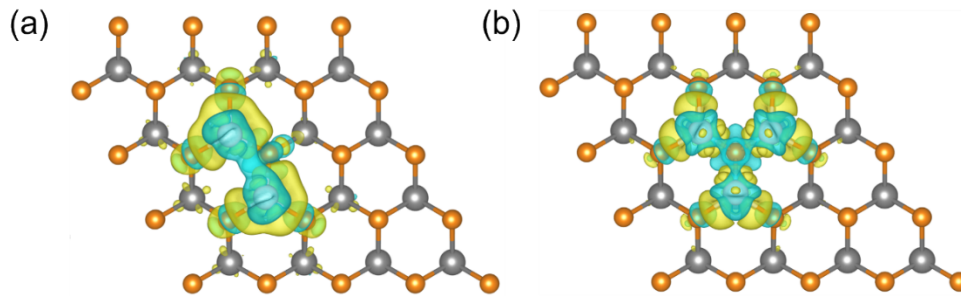

**Figure S6.** Differential charge density of Pd diatom-MoS<sub>2</sub> (a) and Pd triatom-MoS<sub>2</sub> (b) (top view). Yellow color marks the charge accumulation and blue color marks the charge depletion, respectively.

## 8. Fabrication process of Pd/MoS<sub>2</sub> heterostructure inserted with graphene

A dry transfer method was used to prepare graphene/MoS<sub>2</sub> heterostructure with a clean interface. [Figure S7](#) shows the schematic diagram of the fabrication process of graphene transferred onto MoS<sub>2</sub> flake with the subsequent deposition of Pd NPs.

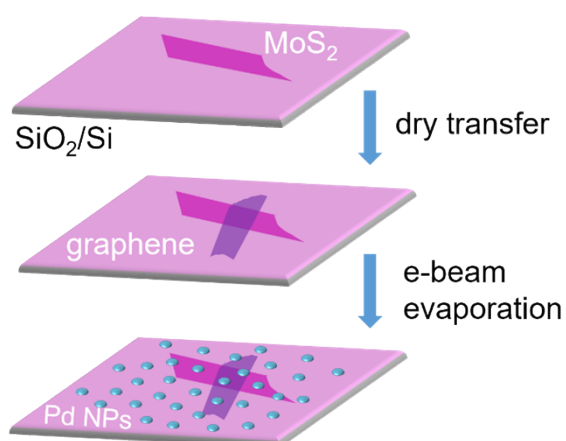

**Figure S7.** Schematic diagram of the preparation process of Pd NPs/graphene/MoS<sub>2</sub> heterostructure.
